# Supplementary material for: Impact of the COVID-19 pandemic on domiciliary care workers in Wales, UK: a data linkage cohort study using the SAIL Databank
Source: HighWire-hosted journal article supplement (doi:10.1136/bmjopen-2022-070637), 2023-06-01
Supplement: bmjopen-2022-070637supp001_data_supplement.pdf [file bmjopen-2022-070637supp001_data_supplement.pdf]

## Supplementary material

**Supplementary material 1: Data sources used in the OSCAR study**

| SAIL acronym | Name                                   | Description                                                                                                                                                                                            | Meta-data link                                                                                                                                                                      |
|--------------|----------------------------------------|--------------------------------------------------------------------------------------------------------------------------------------------------------------------------------------------------------|-------------------------------------------------------------------------------------------------------------------------------------------------------------------------------------|
| ADDE         | Annual District Death Extract          | Monthly register of all deaths relating to Welsh residents, including those that died out of Wales from the Office for National Statistics (ONS).                                                      | <a href="https://web.www.healthdatagateway.org/dataset/15cf4241-abad-4dcc-95b0-8cd7c02be999">https://web.www.healthdatagateway.org/dataset/15cf4241-abad-4dcc-95b0-8cd7c02be999</a> |
| GENW         | ONS 2011 Census Wales                  | A census in the UK is a count of all people and households. The census data held in SAIL was from the census held on 27 March 2011.                                                                    | <a href="https://web.www.healthdatagateway.org/dataset/fc24482c-0f9b-445f-af7a-8598627c3b15">https://web.www.healthdatagateway.org/dataset/fc24482c-0f9b-445f-af7a-8598627c3b15</a> |
| DSCW         | Domiciliary Social Care Worker Dataset | Under the Care Standards Act 2000, SCW maintain a register of DCWs in Wales. The DSCW data was transferred securely from SCW to the SAIL Databank and made available as a core-restricted data source. | NA                                                                                                                                                                                  |
| EDDS         | Emergency Department Dataset           | Data captured for all NHS Wales Accident and Emergency department attendances. Data are collected and coded at each hospital                                                                           | <a href="https://web.www.healthdatagateway.org/dataset/75c4dcb8-33bf-43f4-b2bb-db51b6621b2c">https://web.www.healthdatagateway.org/dataset/75c4dcb8-33bf-43f4-b2bb-db51b6621b2c</a> |
| PATD         | COVID-19 Test results                  | Daily update of all pillar 1 and pillar 2 PCR tests administered and associated results for Welsh residents and those receiving a test in Wales                                                        | <a href="https://web.www.healthdatagateway.org/dataset/f5f6d882-163d-4ef1-a53e-000fba409480">https://web.www.healthdatagateway.org/dataset/f5f6d882-163d-4ef1-a53e-000fba409480</a> |
| PEDW         | Patient Episode Dataset for Wales      | Weekly update of all inpatient and day case activity undertaken in NHS Wales plus data on Welsh residents treated in English Trusts                                                                    | <a href="https://web.www.healthdatagateway.org/dataset/4c33a5d2-164c-41d7-9797-dc2b008cc852">https://web.www.healthdatagateway.org/dataset/4c33a5d2-164c-41d7-9797-dc2b008cc852</a> |
| WDSD         | Welsh Demographic Service Dataset      | Weekly update of all individuals registered with a Welsh general practice, inc. address and practice history                                                                                           | <a href="https://web.www.healthdatagateway.org/dataset/8a8a5e90-b0c6-4839-bcd2-c69e6e8dca6d">https://web.www.healthdatagateway.org/dataset/8a8a5e90-b0c6-4839-bcd2-c69e6e8dca6d</a> |
| WLGP         | Wales Longitudinal General Practice    | Monthly update of all attendance and clinical information for SAIL submitting general practices (~80% national coverage)                                                                               | <a href="https://web.www.healthdatagateway.org/dataset/33fc3ffd-aa4c-4a16-a32f-0c900aaaa3d2">https://web.www.healthdatagateway.org/dataset/33fc3ffd-aa4c-4a16-a32f-0c900aaaa3d2</a> |

## Supplementary material 2: Coding lists for OSCAR outcomes

### Primary outcome

**Confirmed-COVID:** Confirmed COVID-19 will be defined as the earliest of the following events:

- Positive polymerase chain reaction (PCR) test result (Source: PATD);
- Hospital admission (main or secondary diagnostic ICD-10 code of U07.1 position in the admitted patient care component of PEDW);
- Death registration including a diagnosis ICD-10 code U07.1 (as underlying or contributing cause) from COVID-19 (Source: ADDE);
- COVID-19 diagnosis Read code (Source: WLGP).

| TYPE   | CODE  | DESCRIPTION                                           |
|--------|-------|-------------------------------------------------------|
| ICD-10 | U071  | COVID-19 virus identified                             |
| READ   | A795. | Coronavirus infection                                 |
| READ   | A7951 | Disease caused by 2019-nCoV (novel coronavirus)       |
| READ   | A7952 | COVID-19 confirmed by laboratory test                 |
| READ   | A7953 | COVID-19 confirmed using clinical diagnostic criteria |

### Secondary outcomes

#### Suspected COVID-19

We will ascertain DCWs with a suspected COVID-19 diagnosis taking the earliest of:

- Negative PCR or serology/antigen test from the COVID-19 test data (Source: PATD);
- Diagnosis ICD-10 code (U07.2) main or secondary diagnostic code position (Source: PEDW);
- Suspected COVID-19 Read codes (Source: WLGP).

| TYPE   | CODE  | DESCRIPTION                                         |
|--------|-------|-----------------------------------------------------|
| ICD-10 | U072  | COVID-19 virus not identified                       |
| READ   | 1JX.. | Suspected coronavirus infection                     |
| READ   | 1JX1. | Suspected coronavirus infection                     |
| READ   | 65PW. | Coronavirus contact                                 |
| READ   | 65PW1 | Exposure to 2019-nCoV (novel coronavirus) infection |

#### Mental Health

##### (A) Hospital admissions (ICD-10)

| CODE | DESCRIPTION                    |
|------|--------------------------------|
| F20  | Schizophrenia                  |
| F200 | Paranoid schizophrenia         |
| F201 | Hebephrenic schizophrenia      |
| F202 | Catatonic schizophrenia        |
| F203 | Undifferentiated schizophrenia |
| F204 | Post-schizophrenic depression  |

| <b>CODE</b> | <b>DESCRIPTION</b>                                                                       |
|-------------|------------------------------------------------------------------------------------------|
| F205        | Residual schizophrenia                                                                   |
| F206        | Simple schizophrenia                                                                     |
| F208        | Other schizophrenia                                                                      |
| F209        | Schizophrenia, unspecified                                                               |
| F21X        | Schizotypal disorder                                                                     |
| F22         | Persistent delusional disorders                                                          |
| F220        | Delusional disorder                                                                      |
| F228        | Other persistent delusional disorders                                                    |
| F229        | Persistent delusional disorder, unspecified                                              |
| F23         | Acute and transient psychotic disorders                                                  |
| F230        | Acute polymorphic psychotic disorder without symptoms of schizophrenia                   |
| F231        | Acute polymorphic psychotic disorder with symptoms of schizophrenia                      |
| F232        | Acute schizophrenia-like psychotic disorder                                              |
| F233        | Other acute predominantly delusional psychotic disorders                                 |
| F238        | Other acute and transient psychotic disorders                                            |
| F239        | Acute and transient psychotic disorder, unspecified                                      |
| F24X        | Induced delusional disorder                                                              |
| F25         | Schizoaffective disorders                                                                |
| F250        | Schizoaffective disorder, manic type                                                     |
| F251        | Schizoaffective disorder, depressive type                                                |
| F252        | Schizoaffective disorder, mixed type                                                     |
| F258        | Other schizoaffective disorders                                                          |
| F259        | Schizoaffective disorder, unspecified                                                    |
| F28X        | Other nonorganic psychotic disorders                                                     |
| F29X        | Unspecified nonorganic psychosis                                                         |
| F30         | Manic episode                                                                            |
| F300        | Hypomania                                                                                |
| F301        | Mania without psychotic symptoms                                                         |
| F302        | Mania with psychotic symptoms                                                            |
| F308        | Other manic episodes                                                                     |
| F309        | Manic episode, unspecified                                                               |
| F31         | Bipolar affective disorder                                                               |
| F310        | Bipolar affective disorder, current episode hypomanic                                    |
| F311        | Bipolar affective disorder, current episode manic without psychotic symptoms             |
| F312        | Bipolar affective disorder, current episode manic with psychotic symptoms                |
| F313        | Bipolar affective disorder, current episode mild or moderate depression                  |
| F314        | Bipolar affective disorder, current episode severe depression without psychotic symptoms |
| F315        | Bipolar affective disorder, current episode severe depression with psychotic symptoms    |
| F316        | Bipolar affective disorder, current episode mixed                                        |
| F317        | Bipolar affective disorder, currently in remission                                       |
| F318        | Other bipolar affective disorders                                                        |
| F319        | Bipolar affective disorder, unspecified                                                  |
| F32         | Depressive episode                                                                       |
| F320        | Mild depressive episode                                                                  |

| CODE | DESCRIPTION                                                                      |
|------|----------------------------------------------------------------------------------|
| F321 | Moderate depressive episode                                                      |
| F322 | Severe depressive episode without psychotic symptoms                             |
| F323 | Severe depressive episode with psychotic symptoms                                |
| F328 | Other depressive episodes                                                        |
| F329 | Depressive episode, unspecified                                                  |
| F33  | Recurrent depressive disorder                                                    |
| F330 | Recurrent depressive disorder, current episode mild                              |
| F331 | Recurrent depressive disorder, current episode moderate                          |
| F332 | Recurrent depressive disorder, current episode severe without psychotic symptoms |
| F333 | Recurrent depressive disorder, current episode severe with psychotic symptoms    |
| F334 | Recurrent depressive disorder, currently in remission                            |
| F338 | Other recurrent depressive disorders                                             |
| F339 | Recurrent depressive disorder, unspecified                                       |

**(B) GP contacts and prescriptions (Read)**

| CODE  | DESCRIPTION                           |
|-------|---------------------------------------|
| 146D. | H/O: manic depressive disorder        |
| 1B12. | Nerves - nervousness                  |
| 1B13. | Anxiousness                           |
| 1B17. | Depressed                             |
| 1B1U. | Symptoms of depression                |
| 1BH3. | Paranoid ideation                     |
| 1BQ.. | Loss of capacity for enjoyment        |
| 1BT.. | Depressed mood                        |
| 1BU.. | Loss of hope for the future           |
| 2257  | O/E - depressed                       |
| 2258  | O/E - anxious                         |
| 2259  | O/E - nervous                         |
| 66580 | Antidepressant drug treatment changed |
| 66590 | Antidepressant drug treatment started |
| 665A0 | Antidepressant drug treatment stopped |
| d1... | HYPNOTICS                             |
| d11.. | CHLORAL HYDRATE                       |
| d111. | *CHLORAL 500mg/5mL mixture            |
| d112. | CHLORAL PAEDIATRIC 200mg/5mL elixir   |
| d113. | *NOCTEC 500mg capsules                |
| d114. | CHLORAL HYDRATE 500mg capsules        |
| d115. | *WELLDORM 143mg/5mL elixir            |
| d116. | *WELLDORM tablets                     |
| d117. | CHLORAL HYDRATE 414mg tablets         |
| d118. | CHLORAL HYDRATE 143mg/5mL elixir      |
| d119. | CHLORAL HYDRATE 500mg/5mL syrup       |
| d11A. | SOMNWEEL 707mg tablets                |

| <b>CODE</b> | <b>DESCRIPTION</b>                        |
|-------------|-------------------------------------------|
| d12..       | CLOMETHIAZOLE EDISYLATE [HYPNOTIC]        |
| d121.       | *HEMINEVRIN 192mg capsules                |
| d122.       | *HEMINEVRIN 250mg/5mL syrup               |
| d123.       | *HEMINEVRIN 8mg/mL infusion               |
| d12v.       | CLOMETHIAZOLE(base) 192mg capsules        |
| d12w.       | CLOMETHIAZOLE EDISILATE 250mg/5mL syrup   |
| d12z.       | CHLORMETHIAZOLE EDISYLATE 8mg/mL infusion |
| d13..       | *DICHLORALPHENAZONE                       |
| d131.       | *WELLDORM 650mg tablets                   |
| d132.       | *WELLDORM 225mg/5mL elixir                |
| d13y.       | DICHLORALPHENAZONE 650mg tablets          |
| d13z.       | DICHLORALPHENAZONE 225mg/5mL elixir       |
| d14..       | *FLUNITRAZEPAM                            |
| d141.       | *ROHYPNOL 1mg tablets                     |
| d14z.       | *FLUNITRAZEPAM 1mg tablets                |
| d15..       | FLURAZEPAM                                |
| d151.       | DALMANE 15mg capsules                     |
| d152.       | DALMANE 30mg capsules                     |
| d153.       | *PAXANE 15mg capsules                     |
| d154.       | *PAXANE 30mg capsules                     |
| d15y.       | FLURAZEPAM 15mg capsules                  |
| d15z.       | FLURAZEPAM 30mg capsules                  |
| d16..       | LOPRAZOLAM                                |
| d161.       | LOPRAZOLAM 1mg tablets                    |
| d162.       | *DORMONOCT 1mg tablets                    |
| d17..       | LORMETAZEPAM                              |
| d171.       | LORMETAZEPAM 500micrograms tablets        |
| d172.       | LORMETAZEPAM 1mg tablets                  |
| d173.       | NOCTAMID 500micrograms tablets            |
| d174.       | *NOCTAMID 1mg tablets                     |
| d18..       | NITRAZEPAM                                |
| d181.       | *NITRAZEPAM 5mg capsules                  |
| d182.       | NITRAZEPAM 5mg tablets                    |
| d183.       | *NITRAZEPAM 10mg tablets                  |
| d184.       | NITRAZEPAM 2.5mg/5mL mixture              |
| d185.       | *MOGADON 5mg capsules                     |
| d186.       | MOGADON 5mg tablets                       |
| d187.       | *NITRADOS 5mg tablets                     |
| d188.       | *NOCTESED 5mg tablets                     |
| d189.       | REMNOS 5mg tablets                        |
| d18a.       | *REMNOS 10mg tablets                      |
| d18b.       | *SOMNITE 5mg tablets                      |
| d18c.       | *SOMNITE 2.5mg/5mL mixture                |
| d18d.       | *SUREM 5mg capsules                       |
| d18e.       | *UNISOMNIA 5mg tablets                    |

| <b>CODE</b> | <b>DESCRIPTION</b>                            |
|-------------|-----------------------------------------------|
| d18f.       | NITRAZEPAM 5mg/5mL suspension                 |
| d19..       | PROMETHAZINE HCL [HYPNOTIC] see section c8i.. |
| d1a..       | TEMAZEPAM [HYPNOTIC]                          |
| d1a1.       | *TEMAZEPAM 10mg capsules                      |
| d1a2.       | *TEMAZEPAM 15mg capsules                      |
| d1a3.       | *TEMAZEPAM 20mg capsules                      |
| d1a4.       | *TEMAZEPAM 30mg capsules                      |
| d1a5.       | *TEMAZEPAM 10mg/5mL elixir                    |
| d1a6.       | *NORMISON 10mg capsules                       |
| d1a7.       | *NORMISON 20mg capsules                       |
| d1a8.       | *TEMAZEPAM PLANPAK capsules                   |
| d1a9.       | TEMAZEPAM 10mg tablets                        |
| d1aa.       | TEMAZEPAM 20mg tablets                        |
| d1ab.       | TEMAZEPAM GELTHIX 10mg capsules               |
| d1ac.       | TEMAZEPAM GELTHIX 20mg capsules               |
| d1ad.       | TEMAZEPAM GELTHIX 15mg capsules               |
| d1ae.       | TEMAZEPAM GELTHIX 30mg capsules               |
| d1af.       | TEMAZEPAM GEL FILLED 10mg capsules            |
| d1ag.       | TEMAZEPAM GEL FILLED 20mg capsules            |
| d1ah.       | TEMAZEPAM GEL FILLED 15mg capsules            |
| d1ai.       | TEMAZEPAM GEL FILLED 30mg capsules            |
| d1aj.       | TEMAZEPAM 10mg/sachet oral solution           |
| d1ak.       | TEMAZEPAM 20mg/sachet oral solution           |
| d1al.       | EUHYPNOS 10mg/sachet oral solution            |
| d1am.       | EUHYPNOS 20mg/sachet oral solution            |
| d1an.       | EUHYPNOS 10mg/5mL oral solution               |
| d1ao.       | TEMAZEPAM 10mg/5mL sugar free oral solution   |
| d1b..       | *TRIAZOLAM                                    |
| d1b1.       | TRIAZOLAM 125microgram tablets                |
| d1b2.       | TRIAZOLAM 250microgram tablets                |
| d1b3.       | *HALCION 125microgram tablets                 |
| d1b4.       | *HALCION 250microgram tablets                 |
| d1c..       | TRICLOFOS SODIUM                              |
| d1c1.       | *TRICLOFOS 500mg/5mL liquid                   |
| d1d..       | ZOPICLONE                                     |
| d1d1.       | ZOPICLONE 7.5mg tablets                       |
| d1d2.       | ZIMOVANE 7.5mg tablets                        |
| d1d3.       | ZOPICLONE 3.75mg tablets                      |
| d1d4.       | ZIMOVANE LS 3.75mg tablets                    |
| d1d5.       | *ZILEZE 7.5 tablets                           |
| d1d6.       | *ZILEZE 3.75 tablets                          |
| d1e..       | *GLUTETHIMIDE [no drugs here]                 |
| d1f..       | ZOLPIDEM                                      |
| d1f1.       | STILNOCT 5mg tablets                          |
| d1f2.       | ZOLPIDEM TARTRATE 5mg tablets                 |

| <b>CODE</b> | <b>DESCRIPTION</b>                           |
|-------------|----------------------------------------------|
| d1f3.       | ZOLPIDEM TARTRATE 10mg tablets               |
| d1f4.       | STILNOCT 10mg tablets                        |
| d1g..       | ZALEPLON                                     |
| d1g1.       | SONATA 5mg capsules                          |
| d1g2.       | SONATA 10mg capsules                         |
| d1gy.       | ZALEPLON 5mg capsules                        |
| d1gz.       | ZALEPLON 10mg capsules                       |
| d1h..       | MELATONIN                                    |
| d1h1.       | CIRCADIN 2mg m/r tablets                     |
| d1hz.       | MELATONIN 2mg m/r tablets                    |
| d21..       | DIAZEPAM [ANXIOLYTIC]                        |
| d22..       | ALPRAZOLAM                                   |
| d23..       | BROMAZEPAM                                   |
| d24..       | CHLORDIAZEPOXIDE                             |
| d25..       | CHLORMEZANONE                                |
| d26..       | CLOBAZAM                                     |
| d27..       | CLORAZEPATE DIPOTASSIUM                      |
| d28..       | HYDROXYZINE HCL [ANXIOLYTIC]                 |
| d29..       | *KETAZOLAM                                   |
| d2a..       | LORAZEPAM [ANXIOLYTIC]                       |
| d2b..       | *MEDAZEPAM                                   |
| d2c..       | MEPROBAMATE                                  |
| d2d..       | OXAZEPAM                                     |
| d2f..       | BUSPIRONE HYDROCHLORIDE                      |
| d2g..       | FLUMAZENIL                                   |
| d7...       | TRICYCLIC ANTIDEPRESSANTS                    |
| d71..       | AMITRIPTYLINE HYDROCHLORIDE [ANTIDEPRESSANT] |
| d711.       | AMITRIPTYLINE 10mg tablets                   |
| d712.       | AMITRIPTYLINE 25mg tablets                   |
| d713.       | AMITRIPTYLINE 50mg tablets                   |
| d714.       | *DOMICAL 10mg tablets                        |
| d715.       | *DOMICAL 25mg tablets                        |
| d716.       | *DOMICAL 50mg tablets                        |
| d717.       | ELAVIL 10mg tablets                          |
| d718.       | ELAVIL 25mg tablets                          |
| d719.       | *LENTIZOL 25mg m/r capsules                  |
| d71a.       | *LENTIZOL 50mg m/r capsules                  |
| d71b.       | *TRYPTIZOL 75mg m/r capsules                 |
| d71c.       | *TRYPTIZOL 10mg tablets                      |
| d71d.       | *TRYPTIZOL 25mg tablets                      |
| d71e.       | *TRYPTIZOL 50mg tablets                      |
| d71f.       | *TRYPTIZOL 10mg/5mL syrup                    |
| d71g.       | TRYPTIZOL 100mg/10mL injection               |
| d71h.       | AMITRIPTYLINE 25mg/5mL sugar free solution   |
| d71i.       | AMITRIPTYLINE 50mg/5mL sugar free solution   |



| CODE  | DESCRIPTION                                      |
|-------|--------------------------------------------------|
| d71u. | AMITRIPTYLINE 25mg m/r capsules                  |
| d71v. | AMITRIPTYLINE 50mg m/r capsules                  |
| d71w. | AMITRIPTYLINE 75mg m/r capsules                  |
| d71y. | *AMITRIPTYLINE 10mg/5mL syrup                    |
| d71z. | AMITRIPTYLINE HYDROCHLORIDE 100mg/10mL injection |
| d72.. | *BUTRIPTYLINE                                    |
| d721. | *EVADYNE 25mg tablets                            |
| d722. | *EVADYNE 50mg tablets                            |
| d72y. | *BUTRIPTYLINE 25mg tablets                       |
| d72z. | *BUTRIPTYLINE 50mg tablets                       |
| d73.. | CLOMIPRAMINE HYDROCHLORIDE                       |
| d731. | *ANAFRANIL 10mg capsules                         |
| d732. | *ANAFRANIL 25mg capsules                         |
| d733. | *ANAFRANIL 50mg capsules                         |
| d734. | *ANAFRANIL 25mg/5mL syrup                        |
| d735. | *ANAFRANIL 25mg/2mL injection                    |
| d736. | *ANAFRANIL SR 75mg m/r tablets                   |
| d737. | *TRANQUAX 10mg capsules                          |
| d738. | *TRANQUAX 25mg capsules                          |
| d739. | TRANQUAX 50mg capsules                           |
| d73r. | *CLOMIPRAMINE HCL 50mg tablets                   |
| d73s. | *CLOMIPRAMINE HCL 10mg tablets                   |
| d73t. | *CLOMIPRAMINE HCL 25mg tablets                   |
| d73u. | CLOMIPRAMINE HCL 10mg capsules                   |
| d73v. | CLOMIPRAMINE HCL 25mg capsules                   |
| d73w. | CLOMIPRAMINE HCL 50mg capsules                   |
| d73x. | CLOMIPRAMINE HYDROCHLORIDE 25mg/5mL syrup        |
| d73y. | CLOMIPRAMINE HCL 25mg/2mL injection              |
| d73z. | CLOMIPRAMINE HCL 75mg m/r tabs                   |
| d74.. | DESIPRAMINE HYDROCHLORIDE                        |
| d741. | *PERTOFRAN 25mg tablets                          |
| d74z. | DESIPRAMINE HYDROCHLORIDE 25mg tablets           |
| d75.. | DOSULEPIN HYDROCHLORIDE                          |
| d751. | PROTHIADEN 25mg capsules                         |
| d752. | PROTHIADEN 75mg tablets                          |
| d753. | *PREPADINE 25mg capsules                         |
| d754. | *PREPADINE 75mg tablets                          |
| d755. | *DOTHAPAX 25mg capsules                          |
| d756. | *DOTHAPAX 75mg tablets                           |
| d759. | *THADEN 25mg capsules                            |
| d75A. | *THADEN 75mg tablets                             |
| d75y. | DOSULEPIN HYDROCHLORIDE 25mg capsules            |
| d75z. | DOSULEPIN HYDROCHLORIDE 75mg tablets             |
| d76.. | DOXEPIN                                          |
| d761. | *SINEQUAN 10mg capsules x56CP                    |

| <b>CODE</b> | <b>DESCRIPTION</b>                              |
|-------------|-------------------------------------------------|
| d762.       | *SINEQUAN 25mg capsules x28CP                   |
| d763.       | *SINEQUAN 50mg capsules x28CP                   |
| d764.       | *SINEQUAN 75mg capsules x28CP                   |
| d765.       | *SINEPIN 25mg capsules                          |
| d766.       | *SINEPIN 50mg capsules                          |
| d76w.       | *DOXEPIN 10mg capsules                          |
| d76x.       | DOXEPIN 25mg capsules                           |
| d76y.       | DOXEPIN 50mg capsules                           |
| d76z.       | *DOXEPIN 75mg capsules                          |
| d77..       | IMIPRAMINE HYDROCHLORIDE [ANTIDEPRESSANT]       |
| d771.       | IMIPRAMINE 10mg tabs                            |
| d772.       | IMIPRAMINE 25mg tablets                         |
| d773.       | *PRAMINIL 10mg tablets                          |
| d774.       | *PRAMINIL 25mg tablets                          |
| d775.       | *TOFRANIL 10mg tablets                          |
| d776.       | *TOFRANIL 25mg tablets                          |
| d777.       | *TOFRANIL 25mg/5mL syrup                        |
| d77w.       | IMIPRAMINE HYDROCHLORIDE 25mg/5mL oral solution |
| d77x.       | IMIPRAMINE HYDROCHLORIDE 10mg tablets           |
| d77y.       | IMIPRAMINE HYDROCHLORIDE 25mg tablets           |
| d77z.       | IMIPRAMINE HYDROCHLORIDE 25mg/5mL syrup         |
| d78..       | IPRINDOLE                                       |
| d781.       | *PRONDOL 15mg tablets                           |
| d782.       | *PRONDOL 30mg tablets                           |
| d78y.       | *IPRINDOLE 15mg tablets                         |
| d78z.       | *IPRINDOLE 30mg tablets                         |
| d79..       | LOFEPRAMINE                                     |
| d791.       | *GAMANIL 70mg tablets x56CP                     |
| d792.       | LOMONT 70mg/5mL sugar free suspension           |
| d793.       | *FEPRAPAX 70mg tablets                          |
| d794.       | *GAMANIL 70mg tablets                           |
| d79y.       | LOFEPRAMINE 70mg/5mL sugar free suspension      |
| d79z.       | LOFEPRAMINE 70mg tablets                        |
| d7a..       | MAPROTILINE HYDROCHLORIDE                       |
| d7a1.       | *LUDIOMIL 10mg tablets                          |
| d7a2.       | *LUDIOMIL 25mg tablets                          |
| d7a3.       | *LUDIOMIL 50mg tablets                          |
| d7a4.       | *LUDIOMIL 75mg tablets x28CP                    |
| d7aw.       | MAPROTILINE HYDROCHLORIDE 10mg tablets          |
| d7ax.       | MAPROTILINE HYDROCHLORIDE 25mg tablets          |
| d7ay.       | MAPROTILINE HYDROCHLORIDE 50mg tablets          |
| d7az.       | MAPROTILINE HYDROCHLORIDE 75mg tablets          |
| d7b..       | MIANSERIN HYDROCHLORIDE                         |
| d7b1.       | MIANSERIN 10mg tablets                          |
| d7b2.       | MIANSERIN 20mg tablets                          |

| <b>CODE</b> | <b>DESCRIPTION</b>                        |
|-------------|-------------------------------------------|
| d7b3.       | MIANSERIN 30mg tablets                    |
| d7b4.       | *BOLVIDON 10mg tablets                    |
| d7b5.       | *BOLVIDON 20mg tablets                    |
| d7b6.       | *BOLVIDON 30mg tablets                    |
| d7b7.       | *NORVAL 10mg tablets                      |
| d7b8.       | *NORVAL 20mg tablets                      |
| d7b9.       | *NORVAL 30mg tablets                      |
| d7c..       | NORTRIPTYLINE                             |
| d7c1.       | *ALLEGRON 10mg tablets                    |
| d7c2.       | *ALLEGRON 25mg tablets                    |
| d7c3.       | *AVENTYL 10mg capsules                    |
| d7c4.       | *AVENTYL 25mg capsules                    |
| d7c5.       | *AVENTYL 10mg/5mL liquid                  |
| d7c6.       | NORTRIPTYLINE 10mg tablets                |
| d7c7.       | *NORTRIPTYLINE 10mg/5mL liquid            |
| d7c8.       | NORTRIPTYLINE 25mg tablets                |
| d7c9.       | *NORTRIPTYLINE 10mg capsules              |
| d7cy.       | *NORTRIPTYLINE 25mg capsules              |
| d7d..       | PROTRIPTYLINE HYDROCHLORIDE               |
| d7d1.       | *CONCORDIN 5mg tablets                    |
| d7d2.       | *CONCORDIN 10mg tablets                   |
| d7d3.       | PROTRIPTYLINE HYDROCHLORIDE 5mg tablets   |
| d7d4.       | PROTRIPTYLINE HYDROCHLORIDE 10mg tablets  |
| d7e..       | TRAZODONE HYDROCHLORIDE                   |
| d7e1.       | MOLIPAXIN 50mg capsules x84CP             |
| d7e2.       | MOLIPAXIN 100mg capsules x56CP            |
| d7e3.       | *MOLIPAXIN 50mg/5mL liquid                |
| d7e4.       | MOLIPAXIN 150mg tablets x28CP             |
| d7e5.       | TRAZODONE HYDROCHLORIDE 150mg tablets     |
| d7e6.       | MOLIPAXIN CR 150mg m/r tablets x28        |
| d7e7.       | TRAZODONE HYDROCHLORIDE 150mg m/r tablets |
| d7ew.       | TRAZODONE HYDROCHLORIDE 100mg capsules    |
| d7ex.       | TRAZODONE HYDROCHLORIDE 50mg capsules     |
| d7ez.       | TRAZODONE HYDROCHLORIDE 50mg/5mL liquid   |
| d7f..       | TRIMIPRAMINE                              |
| d7f1.       | *SURMONTIL 50mg capsules x28CP            |
| d7f2.       | *SURMONTIL 10mg tablets                   |
| d7f3.       | *SURMONTIL 25mg tablets                   |
| d7fx.       | TRIMIPRAMINE 50mg capsules                |
| d7fy.       | TRIMIPRAMINE 10mg tablets                 |
| d7fz.       | TRIMIPRAMINE 25mg tablets                 |
| d7g..       | VILOXAZINE HYDROCHLORIDE                  |
| d7g1.       | *VIVALAN 50mg tablets                     |
| d7gz.       | *VILOXAZINE 50mg tablets                  |
| d7h..       | AMOXAPINE                                 |

| CODE  | DESCRIPTION                       |
|-------|-----------------------------------|
| d7h1. | *AMOXAPINE 25mg tablets           |
| d7h2. | *AMOXAPINE 50mg tablets           |
| d7h3. | *AMOXAPINE 100mg tablets          |
| d7h4. | *AMOXAPINE 150mg tablets          |
| d7h5. | *ASENDIS 25mg tablets             |
| d7h6. | *ASENDIS 50mg tablets             |
| d7h7. | *ASENDIS 100mg tablets            |
| d7h8. | *ASENDIS 150mg tablets            |
| d9... | COMPOUND ANTIDEPRESSANT DRUGS     |
| d91.. | COMPOUND ANTIDEPRESSANTS A-Z      |
| d911. | *LIMBITROL 5 capsules             |
| d912. | *LIMBITROL 10 capsules            |
| d913. | *MOTIPRESS tablets x28CP          |
| d914. | *MOTIVAL tablets                  |
| d915. | *PARSTELIN tablets                |
| d916. | TRIPTAFEN tablets                 |
| d917. | *TRIPTAFEN-M tablets              |
| da... | OTHER ANTIDEPRESSANT DRUGS        |
| da1.. | FLUPENTIXOL [ANTIDEPRESSANT]      |
| da11. | FLUANXOL 500micrograms tablets    |
| da12. | FLUANXOL 1mg tablets              |
| da1y. | FLUPENTIXOL 500micrograms tablets |
| da1z. | FLUPENTIXOL 1mg tablets           |
| da2.. | TRYPTOPHAN                        |
| da21. | *OPTIMAX 500mg tablets            |
| da22. | *OPTIMAX 1g/6g powder             |
| da23. | *OPTIMAX WV 500mg tablets         |
| da24. | *PACITRON 500mg tablets           |
| da2y. | *TRYPTOPHAN 500mg tablets         |
| da2z. | *TRYPTOPHAN 1g/6g powder          |
| da3.. | FLUVOXAMINE MALEATE               |
| da31. | FAVERIN 50mg tablets              |
| da32. | FLUVOXAMINE MALEATE 50mg tablets  |
| da33. | FAVERIN 100mg tablets             |
| da34. | FLUVOXAMINE MALEATE 100mg tablets |
| da4.. | FLUOXETINE HYDROCHLORIDE          |
| da41. | FLUOXETINE 20mg capsules          |
| da42. | *PROZAC 20mg capsules x30         |
| da43. | FLUOXETINE 20mg/5mL oral liquid   |
| da44. | PROZAC 20mg/5mL oral liquid       |
| da45. | PROZAC 20mg capsules              |
| da46. | FLUOXETINE 60mg capsules          |
| da47. | *PROZAC 60mg capsules             |
| da48. | *FELICIUM 20mg capsules           |
| da49. | OXACTIN 20mg capsules             |

| <b>CODE</b> | <b>DESCRIPTION</b>                    |
|-------------|---------------------------------------|
| da4A.       | RANFLUTIN 20mg capsules               |
| da4B.       | PROZIT 20mg/5mL oral solution         |
| da4C.       | PROZEP 20mg/5mL oral solution         |
| da5..       | SERTRALINE HYDROCHLORIDE              |
| da51.       | SERTRALINE 50mg tablets               |
| da52.       | SERTRALINE 100mg tablets              |
| da53.       | LUSTRAL 50mg tablets                  |
| da54.       | LUSTRAL 100mg tablets                 |
| da6..       | PAROXETINE HYDROCHLORIDE              |
| da61.       | PAROXETINE 20mg tablets               |
| da62.       | SEROXAT 20mg tablets x30              |
| da63.       | PAROXETINE 30mg tablets               |
| da64.       | SEROXAT 30mg tablets x30              |
| da65.       | PAROXETINE 10mg/5mL sugar free liquid |
| da66.       | SEROXAT 10mg/5mL sugar free liquid    |
| da67.       | PAROXETINE 10mg tablets               |
| da68.       | SEROXAT 10mg tablets                  |
| da7..       | VENLAFAXINE                           |
| da71.       | VENLAFAXINE 37.5mg tablets            |
| da72.       | VENLAFAXINE 75mg tablets              |
| da73.       | *EFEXOR 37.5mg tablets                |
| da74.       | *EFEXOR 75mg tablets                  |
| da75.       | *VENLAFAXINE 50mg tablets             |
| da76.       | *EFEXOR 50mg tablets                  |
| da77.       | VENLAFAXINE 75mg m/r capsules         |
| da78.       | EFEXOR XL 75mg m/r capsules           |
| da79.       | VENLAFAXINE 150mg m/r capsules        |
| da7a.       | VENAXX XL 150mg m/r capsules          |
| da7A.       | EFEXOR XL 150mg m/r capsules          |
| da7b.       | VAXALIN XL 75mg m/r capsules          |
| da7B.       | RODOMEL XL 75mg m/r capsules          |
| da7c.       | VAXALIN XL 150mg m/r capsules         |
| da7C.       | RODOMEL XL 150mg m/r capsules         |
| da7d.       | ALVENTA XL 75mg m/r capsules          |
| da7D.       | WINFEX XL 75mg m/r capsules           |
| da7e.       | ALVENTA XL 150mg m/r capsules         |
| da7E.       | WINFEX XL 150mg m/r capsules          |
| da7f.       | RANFAXINE XL 150mg m/r capsules       |
| da7F.       | TRIXAT XL 75mg m/r capsules           |
| da7g.       | RANFAXINE XL 75mg m/r capsules        |
| da7G.       | TRIXAT XL 150mg m/r capsules          |
| da7h.       | BONILUX XL 75mg m/r capsules          |
| da7H.       | VIEPAX XL 75mg m/r tablets            |
| da7i.       | BONILUX XL 150mg m/r capsules         |
| da7I.       | VENLAFAXINE 75mg m/r tablets          |

| <b>CODE</b> | <b>DESCRIPTION</b>                                         |
|-------------|------------------------------------------------------------|
| da7j.       | TONPULAR XL 75mg m/r capsules                              |
| da7J.       | VIEPAX XL 150mg m/r tablets                                |
| da7k.       | TONPULAR XL 150mg m/r capsules                             |
| da7K.       | VENLAFAXINE 150mg m/r tablets                              |
| da7l.       | FORAVEN XL 75mg m/r capsules                               |
| da7L.       | *TARDCAPS XL 75mg m/r capsules                             |
| da7m.       | FORAVEN XL 150mg m/r capsules                              |
| da7M.       | *TARDCAPS XL 150mg m/r capsule                             |
| da7n.       | DEPEFEX XL 75mg m/r capsules                               |
| da7N.       | VIEPAX 37.5mg tablets                                      |
| da7o.       | DEPEFEX XL 150mg m/r capsules                              |
| da7O.       | VIEPAX 75mg tablets                                        |
| da7p.       | VENLALIC XL 37.5mg m/r tablets                             |
| da7P.       | VENSIR XL 75mg m/r capsules                                |
| da7q.       | VENLAFAXINE 37.5mg m/r tablets                             |
| da7Q.       | VENSIR XL 150mg m/r capsules                               |
| da7R.       | TIFAXIN XL 75mg m/r capsules                               |
| da7S.       | TIFAXIN XL 150mg m/r capsules                              |
| da7T.       | VEXARIN XL 75mg m/r capsules                               |
| da7U.       | VEXARIN XL 150mg m/r capsules                              |
| da7V.       | VENLALIC XL 75mg m/r tablets                               |
| da7W.       | VENLALIC XL 150mg m/r tablets                              |
| da7X.       | VENLALIC XL 225mg m/r tablets                              |
| da7Y.       | VENLAFAXINE 225mg m/r tablets                              |
| da7Z.       | VENAXX XL 75mg m/r capsules                                |
| da8..       | NEFAZODONE                                                 |
| da81.       | NEFAZODONE HYDROCHLORIDE 100mg tablets                     |
| da82.       | NEFAZODONE HYDROCHLORIDE 200mg tablets                     |
| da83.       | *DUTONIN 100mg tablets                                     |
| da84.       | *DUTONIN 200mg tablets                                     |
| da85.       | NEFAZODONE HCL 50mg+100mg+200mg initiation tablets pack    |
| da86.       | DUTONIN 50mg+100mg+200mg treatment initiation tablets pack |
| da9..       | CITALOPRAM                                                 |
| da91.       | CITALOPRAM 20mg tablets                                    |
| da92.       | CIPRAMIL 20mg tablets                                      |
| da93.       | CITALOPRAM 10mg tablets                                    |
| da94.       | *CIPRAMIL 10mg tablets                                     |
| da95.       | CITALOPRAM 40mg tablets                                    |
| da96.       | *CIPRAMIL 40mg tablets                                     |
| da97.       | CIPRAMIL 40mg/mL oral drops 15mL                           |
| da98.       | *PAXORAN 10mg tablets                                      |
| da99.       | *PAXORAN 20mg tablets                                      |
| da9A.       | *PAXORAN 40mg tablets                                      |
| da9z.       | CITALOPRAM 40mg/mL oral drops                              |
| daA..       | REBOXETINE                                                 |

| <b>CODE</b> | <b>DESCRIPTION</b>                                         |
|-------------|------------------------------------------------------------|
| daA1.       | REBOXETINE 4mg tablets                                     |
| daA2.       | EDRONAX 4mg tablets                                        |
| daB..       | MIRTAZAPINE                                                |
| daB1.       | MIRTAZAPINE 30mg tablets                                   |
| daB2.       | *ZISPIN 30mg tablets                                       |
| daB3.       | MIRTAZAPINE 30mg oro-dispersible tablets                   |
| daB4.       | ZISPIN SOLTAB 30mg oro-dispersible tablets                 |
| daB5.       | MIRTAZAPINE 15mg oro-dispersible tablets                   |
| daB6.       | ZISPIN SOLTAB 15mg oro-dispersible tablets                 |
| daB7.       | MIRTAZAPINE 45mg oro-dispersible tablets                   |
| daB8.       | ZISPIN SOLTAB 45mg oro-dispersible tablets                 |
| daBy.       | MIRTAZAPINE 45mg tablets                                   |
| daBz.       | MIRTAZAPINE 15mg tablets                                   |
| daC..       | ESCITALOPRAM                                               |
| daC1.       | ESCITALOPRAM 10mg tablets                                  |
| daC2.       | CIPRALEX 10mg tablets                                      |
| daC3.       | ESCITALOPRAM 20mg tablets                                  |
| daC4.       | CIPRALEX 20mg tablets                                      |
| daC5.       | ESCITALOPRAM 5mg tablets                                   |
| daC6.       | CIPRALEX 5mg tablets                                       |
| daC7.       | ESCITALOPRAM 10mg/mL oral drops                            |
| daC8.       | *CIPRALEX 10mg/mL oral drops                               |
| daC9.       | CIPRALEX 20mg/mL oral drops                                |
| daCA.       | ESCITALOPRAM 20mg/mL oral drops                            |
| daD..       | AGOMELATINE                                                |
| daD1.       | VALDOXAN 25mg tablets                                      |
| daD2.       | AGOMELATINE 25mg tablets                                   |
| E1...       | Non-organic psychoses                                      |
| E10..       | Schizophrenic disorders                                    |
| E100.       | Simple schizophrenia                                       |
| E1000       | Unspecified schizophrenia                                  |
| E1001       | Subchronic schizophrenia                                   |
| E1002       | Chronic schizophrenic                                      |
| E1003       | Acute exacerbation of subchronic schizophrenia             |
| E1004       | Acute exacerbation of chronic schizophrenia                |
| E1005       | Schizophrenia in remission                                 |
| E100z       | Simple schizophrenia NOS                                   |
| E101.       | Hebephrenic schizophrenia                                  |
| E1010       | Unspecified hebephrenic schizophrenia                      |
| E1011       | Subchronic hebephrenic schizophrenia                       |
| E1012       | Chronic hebephrenic schizophrenia                          |
| E1013       | Acute exacerbation of subchronic hebephrenic schizophrenia |
| E1014       | Acute exacerbation of chronic hebephrenic schizophrenia    |
| E1015       | Hebephrenic schizophrenia in remission                     |
| E101z       | Hebephrenic schizophrenia NOS                              |



| <b>CODE</b> | <b>DESCRIPTION</b>                                           |
|-------------|--------------------------------------------------------------|
| E102.       | Catatonic schizophrenia                                      |
| E1020       | Unspecified catatonic schizophrenia                          |
| E1021       | Subchronic catatonic schizophrenia                           |
| E1022       | Chronic catatonic schizophrenia                              |
| E1023       | Acute exacerbation of subchronic catatonic schizophrenia     |
| E1024       | Acute exacerbation of chronic catatonic schizophrenia        |
| E1025       | Catatonic schizophrenia in remission                         |
| E102z       | Catatonic schizophrenia NOS                                  |
| E103.       | Paranoid schizophrenia                                       |
| E1030       | Unspecified paranoid schizophrenia                           |
| E1031       | Subchronic paranoid schizophrenia                            |
| E1032       | Chronic paranoid schizophrenia                               |
| E1033       | Acute exacerbation of subchronic paranoid schizophrenia      |
| E1034       | Acute exacerbation of chronic paranoid schizophrenia         |
| E1035       | Paranoid schizophrenia in remission                          |
| E103z       | Paranoid schizophrenia NOS                                   |
| E104.       | Acute schizophrenic episode                                  |
| E105.       | Latent schizophrenia                                         |
| E1050       | Unspecified latent schizophrenia                             |
| E1051       | Subchronic latent schizophrenia                              |
| E1052       | Chronic latent schizophrenia                                 |
| E1053       | Acute exacerbation of subchronic latent schizophrenia        |
| E1054       | Acute exacerbation of chronic latent schizophrenia           |
| E1055       | Latent schizophrenia in remission                            |
| E105z       | Latent schizophrenia NOS                                     |
| E106.       | Residual schizophrenia                                       |
| E107.       | Schizo-affective schizophrenia                               |
| E1070       | Unspecified schizo-affective schizophrenia                   |
| E1071       | Subchronic schizo-affective schizophrenia                    |
| E1072       | Chronic schizo-affective schizophrenia                       |
| E1073       | Acute exacerbation subchronic schizo-affective schizophrenia |
| E1074       | Acute exacerbation of chronic schizo-affective schizophrenia |
| E1075       | Schizo-affective schizophrenia in remission                  |
| E107z       | Schizo-affective schizophrenia NOS                           |
| E10y.       | Other schizophrenia                                          |
| E10y0       | Atypical schizophrenia                                       |
| E10y1       | Coenesthopathic schizophrenia                                |
| E10yz       | Other schizophrenia NOS                                      |
| E10z.       | Schizophrenia NOS                                            |
| E11..       | Affective psychoses                                          |
| E110.       | Manic disorder, single episode                               |
| E1100       | Single manic episode, unspecified                            |
| E1101       | Single manic episode, mild                                   |
| E1102       | Single manic episode, moderate                               |
| E1103       | Single manic episode, severe without mention of psychosis    |



| <b>CODE</b> | <b>DESCRIPTION</b>                                            |
|-------------|---------------------------------------------------------------|
| E1104       | Single manic episode, severe, with psychosis                  |
| E1105       | Single manic episode in partial or unspecified remission      |
| E1106       | Single manic episode in full remission                        |
| E110z       | Manic disorder, single episode NOS                            |
| E111.       | Recurrent manic episodes                                      |
| E1110       | Recurrent manic episodes, unspecified                         |
| E1111       | Recurrent manic episodes, mild                                |
| E1112       | Recurrent manic episodes, moderate                            |
| E1113       | Recurrent manic episodes, severe without mention psychosis    |
| E1114       | Recurrent manic episodes, severe, with psychosis              |
| E1115       | Recurrent manic episodes, partial or unspecified remission    |
| E1116       | Recurrent manic episodes, in full remission                   |
| E111z       | Recurrent manic episode NOS                                   |
| E112.       | Single major depressive episode                               |
| E1120       | Single major depressive episode, unspecified                  |
| E1121       | Single major depressive episode, mild                         |
| E1122       | Single major depressive episode, moderate                     |
| E1123       | Single major depressive episode, severe, without psychosis    |
| E1124       | Single major depressive episode, severe, with psychosis       |
| E1125       | Single major depressive episode, partial or unspec remission  |
| E1126       | Single major depressive episode, in full remission            |
| E112z       | Single major depressive episode NOS                           |
| E113.       | Recurrent major depressive episode                            |
| E1130       | Recurrent major depressive episodes, unspecified              |
| E1131       | Recurrent major depressive episodes, mild                     |
| E1132       | Recurrent major depressive episodes, moderate                 |
| E1133       | Recurrent major depressive episodes, severe, no psychosis     |
| E1134       | Recurrent major depressive episodes, severe, with psychosis   |
| E1135       | Recurrent major depressive episodes, partial/unspec remission |
| E1136       | Recurrent major depressive episodes, in full remission        |
| E1137       | Recurrent depression                                          |
| E113z       | Recurrent major depressive episode NOS                        |
| E114.       | Bipolar affective disorder, currently manic                   |
| E1140       | Bipolar affective disorder, currently manic, unspecified      |
| E1141       | Bipolar affective disorder, currently manic, mild             |
| E1142       | Bipolar affective disorder, currently manic, moderate         |
| E1143       | Bipolar affect disord, currently manic, severe, no psychosis  |
| E1144       | Bipolar affect disord, currently manic, severe with psychosis |
| E1145       | Bipolar affect disord, currently manic, part/unspec remission |
| E1146       | Bipolar affective disorder, currently manic, full remission   |
| E114z       | Bipolar affective disorder, currently manic, NOS              |
| E115.       | Bipolar affective disorder, currently depressed               |
| E1150       | Bipolar affective disorder, currently depressed, unspecified  |
| E1151       | Bipolar affective disorder, currently depressed, mild         |
| E1152       | Bipolar affective disorder, currently depressed, moderate     |

| <b>CODE</b> | <b>DESCRIPTION</b>                                            |
|-------------|---------------------------------------------------------------|
| E1153       | Bipolar affect disord, now depressed, severe, no psychosis    |
| E1154       | Bipolar affect disord, now depressed, severe with psychosis   |
| E1155       | Bipolar affect disord, now depressed, part/unspec remission   |
| E1156       | Bipolar affective disorder, now depressed, in full remission  |
| E115z       | Bipolar affective disorder, currently depressed, NOS          |
| E116.       | Mixed bipolar affective disorder                              |
| E1160       | Mixed bipolar affective disorder, unspecified                 |
| E1161       | Mixed bipolar affective disorder, mild                        |
| E1162       | Mixed bipolar affective disorder, moderate                    |
| E1163       | Mixed bipolar affective disorder, severe, without psychosis   |
| E1164       | Mixed bipolar affective disorder, severe, with psychosis      |
| E1165       | Mixed bipolar affective disorder, partial/unspec remission    |
| E1166       | Mixed bipolar affective disorder, in full remission           |
| E116z       | Mixed bipolar affective disorder, NOS                         |
| E117.       | Unspecified bipolar affective disorder                        |
| E1170       | Unspecified bipolar affective disorder, unspecified           |
| E1171       | Unspecified bipolar affective disorder, mild                  |
| E1172       | Unspecified bipolar affective disorder, moderate              |
| E1173       | Unspecified bipolar affective disorder, severe, no psychosis  |
| E1174       | Unspecified bipolar affective disorder, severe with psychosis |
| E1175       | Unspecified bipolar affect disord, partial/unspec remission   |
| E1176       | Unspecified bipolar affective disorder, in full remission     |
| E117z       | Unspecified bipolar affective disorder, NOS                   |
| E118.       | Seasonal affective disorder                                   |
| E11y.       | Other and unspecified manic-depressive psychoses              |
| E11y0       | Unspecified manic-depressive psychoses                        |
| E11y1       | Atypical manic disorder                                       |
| E11y2       | Atypical depressive disorder                                  |
| E11y3       | Other mixed manic-depressive psychoses                        |
| E11yz       | Other and unspecified manic-depressive psychoses NOS          |
| E11z.       | Other and unspecified affective psychoses                     |
| E11z0       | Unspecified affective psychoses NOS                           |
| E11zz       | Other affective psychosis NOS                                 |
| E12..       | Paranoid states                                               |
| E120.       | Simple paranoid state                                         |
| E121.       | Chronic paranoid psychosis                                    |
| E122.       | Paraphrenia                                                   |
| E123.       | Shared paranoid disorder                                      |
| E12y.       | Other paranoid states                                         |
| E12y0       | Paranoia querulans                                            |
| E12yz       | Other paranoid states NOS                                     |
| E12z.       | Paranoid psychosis NOS                                        |
| E13..       | Other nonorganic psychoses                                    |
| E130.       | Reactive depressive psychosis                                 |
| E131.       | Acute hysterical psychosis                                    |

| <b>CODE</b> | <b>DESCRIPTION</b>                                       |
|-------------|----------------------------------------------------------|
| E132.       | Reactive confusion                                       |
| E133.       | Acute paranoid reaction                                  |
| E134.       | Psychogenic paranoid psychosis                           |
| E135.       | Agitated depression                                      |
| E13y.       | Other reactive psychoses                                 |
| E13y0       | Psychogenic stupor                                       |
| E13y1       | Brief reactive psychosis                                 |
| E13yz       | Other reactive psychoses NOS                             |
| E13z.       | Nonorganic psychosis NOS                                 |
| E1y..       | Other specified non-organic psychoses                    |
| E1z..       | Non-organic psychosis NOS                                |
| E200.       | Anxiety states                                           |
| E2000       | Anxiety state unspecified                                |
| E2001       | Panic disorder                                           |
| E2002       | Generalised anxiety disorder                             |
| E2003       | Anxiety with depression                                  |
| E2004       | Chronic anxiety                                          |
| E2005       | Recurrent anxiety                                        |
| E200z       | Anxiety state NOS                                        |
| E204.       | Neurotic depression reactive type                        |
| E212.       | Schizoid personality disorder                            |
| E2120       | Unspecified schizoid personality disorder                |
| E2121       | Introverted personality                                  |
| E2122       | Schizotypal personality                                  |
| E212z       | Schizoid personality disorder NOS                        |
| E258.       | Nondependent antidepressant type drug abuse              |
| E2580       | Nondependent antidepressant type drug abuse, unspecified |
| E2581       | Nondependent antidepressant type drug abuse, continuous  |
| E2582       | Nondependent antidepressant type drug abuse, episodic    |
| E2583       | Nondependent antidepressant type drug abuse in remission |
| E258z       | Nondependent antidepressant type drug abuse NOS          |
| E291.       | Prolonged depressive reaction                            |
| E2B..       | Depressive disorder NEC                                  |
| E2B0.       | Postviral depression                                     |
| E2B1.       | Chronic depression                                       |
| Eu...       | [X]Mental and behavioural disorders                      |
| Eu2..       | [X]Schizophrenia, schizotypal and delusional disorders   |
| Eu20.       | [X]Schizophrenia                                         |
| Eu200       | [X]Paranoid schizophrenia                                |
| Eu201       | [X]Hebephrenic schizophrenia                             |
| Eu202       | [X]Catatonic schizophrenia                               |
| Eu203       | [X]Undifferentiated schizophrenia                        |
| Eu204       | [X]Post-schizophrenic depression                         |
| Eu205       | [X]Residual schizophrenia                                |
| Eu206       | [X]Simple schizophrenia                                  |

| CODE  | DESCRIPTION                                                  |
|-------|--------------------------------------------------------------|
| Eu20y | [X]Other schizophrenia                                       |
| Eu20z | [X]Schizophrenia, unspecified                                |
| Eu21. | [X]Schizotypal disorder                                      |
| Eu22. | [X]Persistent delusional disorders                           |
| Eu220 | [X]Delusional disorder                                       |
| Eu221 | [X]Delusional misidentification syndrome                     |
| Eu222 | [X]Cotard syndrome                                           |
| Eu223 | [X]Paranoid state in remission                               |
| Eu22y | [X]Other persistent delusional disorders                     |
| Eu22z | [X]Persistent delusional disorder, unspecified               |
| Eu23. | [X]Acute and transient psychotic disorders                   |
| Eu230 | [X]Acute polymorphic psychot disord without symp of schizoph |
| Eu231 | [X]Acute polymorphic psychot disord with symp of schizophren |
| Eu232 | [X]Acute schizophrenia-like psychotic disorder               |
| Eu233 | [X]Other acute predominantly delusional psychotic disorders  |
| Eu23y | [X]Other acute and transient psychotic disorders             |
| Eu23z | [X]Acute and transient psychotic disorder, unspecified       |
| Eu24. | [X]Induced delusional disorder                               |
| Eu25. | [X]Schizoaffective disorders                                 |
| Eu250 | [X]Schizoaffective disorder, manic type                      |
| Eu251 | [X]Schizoaffective disorder, depressive type                 |
| Eu252 | [X]Schizoaffective disorder, mixed type                      |
| Eu25y | [X]Other schizoaffective disorders                           |
| Eu25z | [X]Schizoaffective disorder, unspecified                     |
| Eu26. | [X]Nonorganic psychosis in remission                         |
| Eu2y. | [X]Other nonorganic psychotic disorders                      |
| Eu2z. | [X]Unspecified nonorganic psychosis                          |
| Eu3.. | [X]Mood - affective disorders                                |
| Eu30. | [X]Manic episode                                             |
| Eu300 | [X]Hypomania                                                 |
| Eu301 | [X]Mania without psychotic symptoms                          |
| Eu302 | [X]Mania with psychotic symptoms                             |
| Eu30y | [X]Other manic episodes                                      |
| Eu30z | [X]Manic episode, unspecified                                |
| Eu31. | [X]Bipolar affective disorder                                |
| Eu310 | [X]Bipolar affective disorder, current episode hypomanic     |
| Eu311 | [X]Bipolar affect disorder cur epi manic wout psychotic symp |
| Eu312 | [X]Bipolar affect disorder cur epi manic with psychotic symp |
| Eu313 | [X]Bipolar affect disorder cur epi mild or moderate depressn |
| Eu314 | [X]Bipol aff disord, curr epis sev depress, no psychot symp  |
| Eu315 | [X]Bipolar affect dis cur epi severe depres with psyc symp   |
| Eu316 | [X]Bipolar affective disorder, current episode mixed         |
| Eu317 | [X]Bipolar affective disorder, currently in remission        |
| Eu318 | [X]Bipolar affective disorder type I                         |
| Eu319 | [X]Bipolar affective disorder type II                        |

| CODE  | DESCRIPTION                                                  |
|-------|--------------------------------------------------------------|
| Eu31y | [X]Other bipolar affective disorders                         |
| Eu31z | [X]Bipolar affective disorder, unspecified                   |
| Eu32. | [X]Depressive episode                                        |
| Eu320 | [X]Mild depressive episode                                   |
| Eu321 | [X]Moderate depressive episode                               |
| Eu322 | [X]Severe depressive episode without psychotic symptoms      |
| Eu323 | [X]Severe depressive episode with psychotic symptoms         |
| Eu324 | [X]Mild depression                                           |
| Eu328 | [X]Major depression, severe with psychotic symptoms          |
| Eu329 | [X]Single major depr ep, severe with psych, psych in remiss  |
| Eu32A | [X]Recurr major depr ep, severe with psych, psych in remiss  |
| Eu32y | [X]Other depressive episodes                                 |
| Eu32z | [X]Depressive episode, unspecified                           |
| Eu33. | [X]Recurrent depressive disorder                             |
| Eu330 | [X]Recurrent depressive disorder, current episode mild       |
| Eu331 | [X]Recurrent depressive disorder, current episode moderate   |
| Eu332 | [X]Recurr depress disorder cur epi severe without psyc sympt |
| Eu333 | [X]Recurrent depress disorder cur epi severe with psyc symp  |
| Eu334 | [X]Recurrent depressive disorder, currently in remission     |
| Eu33y | [X]Other recurrent depressive disorders                      |
| Eu33z | [X]Recurrent depressive disorder, unspecified                |
| Eu34. | [X]Persistent mood affective disorders                       |
| Eu341 | [X]Dysthymia                                                 |
| Eu34y | [X]Other persistent mood affective disorders                 |
| Eu34z | [X]Persistent mood affective disorder, unspecified           |
| Eu3y. | [X]Other mood affective disorders                            |
| Eu3y0 | [X]Other single mood affective disorders                     |
| Eu3y1 | [X]Other recurrent mood affective disorders                  |
| Eu3yy | [X]Other specified mood affective disorders                  |
| Eu3z. | [X]Unspecified mood affective disorder                       |
| Eu41. | [X]Other anxiety disorders                                   |
| Eu410 | [X]Panic disorder [episodic paroxysmal anxiety]              |
| Eu411 | [X]Generalized anxiety disorder                              |
| Eu412 | [X]Mixed anxiety and depressive disorder                     |
| Eu413 | [X]Other mixed anxiety disorders                             |
| Eu41y | [X]Other specified anxiety disorders                         |
| Eu41z | [X]Anxiety disorder, unspecified                             |
| Eu601 | [X]Schizoid personality disorder                             |
| R2y2. | [D]Nervousness                                               |
| SL90. | Antidepressant poisoning                                     |
| SL90z | Anti-depressant poisoning NOS                                |
| SyuFK | [X]Poisoning by other and unspecified antidepressants        |
| T840. | Accidental poisoning by antidepressants                      |
| T840z | Accidental poisoning by antidepressants NOS                  |
| TJ90. | Adverse reaction to antidepressants                          |

| CODE  | DESCRIPTION                                                     |
|-------|-----------------------------------------------------------------|
| TJ90z | Adverse reaction to antidepressants NOS                         |
| U6090 | [X]Tricyclic/tetracyc antidepress caus advers eff therapeut use |
| U6091 | [X]Monoamine oxid inhib antidep caus advers eff therap use      |
| U6092 | [X]Other unspec antidepress caus advers effect in therap use    |
| ZV110 | [V]Personal history of schizophrenia                            |
| ZV111 | [V]Personal history of affective disorder                       |

**Fit notes (Read)**

| CODE  | DESCRIPTION                                                 |
|-------|-------------------------------------------------------------|
| 13JJ1 | Benefit agncy reprt unfit for work but fit note no lng need |
| 9D1.. | MED3 - doctor's statement                                   |
| 9D11. | MED3 issued to patient                                      |
| 9D12. | MED3 duplicate issued                                       |
| 9D14. | MED3 issued - back to work                                  |
| 9D15. | eMED3 (2010) new statement issued, not fit for work         |
| 9D19. | MED3 (2010) issued by hand, not fit for work                |
| 9D1C. | MED3 (2010) issued to patient                               |
| 9D1Z. | MED3 - NOS                                                  |
| 9D5.. | Private sickness certificate                                |
| 9DC.. | SC1 - self certificate admin.                               |
| 9DC1. | SC1 self-certificate advised                                |
| 9DC2. | SC1 self certificate given                                  |
| 9DCZ. | SC1 self-certification NOS                                  |
| 9DL.. | SC2 - self-certificate administration                       |
| 9DL0. | SC2 self-certificate advised                                |
| 9DL1. | SC2 self certificate given                                  |
| 9K8.. | Sickness certificate                                        |
| ZV680 | [V]Issue of medical certificate                             |

**Hospital admissions for Non-COVID-19 respiratory infections (ICD-10)**

| CODE | DESCRIPTION                                                                          |
|------|--------------------------------------------------------------------------------------|
| A37  | Whooping cough                                                                       |
| A370 | Whooping cough due to Bordetella pertussis                                           |
| A371 | Whooping cough due to Bordetella parapertussis                                       |
| A378 | Whooping cough due to other Bordetella species                                       |
| A379 | Whooping cough, unspecified                                                          |
| B012 | Varicella pneumonia                                                                  |
| B052 | Measles complicated by pneumonia                                                     |
| B250 | Cytomegaloviral pneumonitis                                                          |
| J10  | Influenza due to identified seasonal influenza virus                                 |
| J100 | Influenza with pneumonia, seasonal influenza virus identified                        |
| J101 | Influenza with other respiratory manifestations, seasonal influenza virus identified |

| <b>CODE</b> | <b>DESCRIPTION</b>                                                       |
|-------------|--------------------------------------------------------------------------|
| J108        | Influenza with other manifestations, seasonal influenza virus identified |
| J11         | Influenza, virus not identified                                          |
| J110        | Influenza with pneumonia, virus not identified                           |
| J111        | Influenza with other respiratory manifestations, virus not identified    |
| J118        | Influenza with other manifestations, virus not identified                |
| J12         | Viral pneumonia, not elsewhere classified                                |
| J120        | Adenoviral pneumonia                                                     |
| J121        | Respiratory syncytial virus pneumonia                                    |
| J122        | Parainfluenza virus pneumonia                                            |
| J123        | Human metapneumovirus pneumonia                                          |
| J128        | Other viral pneumonia                                                    |
| J129        | Viral pneumonia, unspecified                                             |
| J15         | Bacterial pneumonia, not elsewhere classified                            |
| J150        | Pneumonia due to <i>Klebsiella pneumoniae</i>                            |
| J151        | Pneumonia due to <i>Pseudomonas</i>                                      |
| J152        | Pneumonia due to staphylococcus                                          |
| J153        | Pneumonia due to streptococcus, group B                                  |
| J154        | Pneumonia due to other streptococci                                      |
| J155        | Pneumonia due to <i>Escherichia coli</i>                                 |
| J156        | Pneumonia due to other Gram-negative bacteria                            |
| J157        | Pneumonia due to <i>Mycoplasma pneumoniae</i>                            |
| J158        | Other bacterial pneumonia                                                |
| J159        | Bacterial pneumonia, unspecified                                         |
| J16         | Pneumonia due to other infectious organisms, not elsewhere classified    |
| J168        | Pneumonia due to other specified infectious organisms                    |
| J17         | Pneumonia in diseases classified elsewhere                               |
| J170        | Pneumonia in bacterial diseases classified elsewhere                     |
| J171        | Pneumonia in viral diseases classified elsewhere                         |
| J172        | Pneumonia in mycoses                                                     |
| J173        | Pneumonia in parasitic diseases                                          |
| J178        | Pneumonia in other diseases classified elsewhere                         |
| J18         | Pneumonia, organism unspecified                                          |
| J180        | Bronchopneumonia, unspecified                                            |
| J181        | Lobar pneumonia, unspecified                                             |
| J182        | Hypostatic pneumonia, unspecified                                        |
| J188        | Other pneumonia, organism unspecified                                    |
| J189        | Pneumonia, unspecified                                                   |
| J20         | Acute bronchitis                                                         |
| J200        | Acute bronchitis due to <i>Mycoplasma pneumoniae</i>                     |
| J201        | Acute bronchitis due to <i>Haemophilus influenzae</i>                    |
| J202        | Acute bronchitis due to streptococcus                                    |
| J203        | Acute bronchitis due to coxsackievirus                                   |
| J204        | Acute bronchitis due to parainfluenza virus                              |
| J205        | Acute bronchitis due to respiratory syncytial virus                      |
| J206        | Acute bronchitis due to rhinovirus                                       |

| <b>CODE</b> | <b>DESCRIPTION</b>                                                           |
|-------------|------------------------------------------------------------------------------|
| J207        | Acute bronchitis due to echovirus                                            |
| J208        | Acute bronchitis due to other specified organisms                            |
| J209        | Acute bronchitis, unspecified                                                |
| J21         | Acute bronchiolitis                                                          |
| J210        | Acute bronchiolitis due to respiratory syncytial virus                       |
| J211        | Acute bronchiolitis due to human metapneumovirus                             |
| J218        | Acute bronchiolitis due to other specified organisms                         |
| J219        | Acute bronchiolitis, unspecified                                             |
| J41         | Simple and mucopurulent chronic bronchitis                                   |
| J410        | Simple chronic bronchitis                                                    |
| J411        | Mucopurulent chronic bronchitis                                              |
| J418        | Mixed simple and mucopurulent chronic bronchitis                             |
| J43         | Emphysema                                                                    |
| J430        | MacLeod syndrome                                                             |
| J431        | Panlobular emphysema                                                         |
| J432        | Centrilobular emphysema                                                      |
| J438        | Other emphysema                                                              |
| J439        | Emphysema, unspecified                                                       |
| J440        | Chronic obstructive pulmonary disease with acute lower respiratory infection |
| J441        | Chronic obstructive pulmonary disease with acute exacerbation, unspecified   |
| J448        | Other specified chronic obstructive pulmonary disease                        |
| J449        | Chronic obstructive pulmonary disease, unspecified                           |
| J45         | Asthma                                                                       |
| J450        | Predominantly allergic asthma                                                |
| J451        | Nonallergic asthma                                                           |
| J458        | Mixed asthma                                                                 |
| J459        | Asthma, unspecified                                                          |
| J851        | Abscess of lung with pneumonia                                               |
| J86         | Pyothorax                                                                    |
| J860        | Pyothorax with fistula                                                       |
| J869        | Pyothorax without fistula                                                    |
| J982        | Interstitial emphysema                                                       |
| J983        | Compensatory emphysema                                                       |
| U04         | Severe acute respiratory syndrome [SARS]                                     |



**Supplementary material 3: The RECORD statement – checklist of items, extended from the STROBE statement, that should be reported in observational studies using routinely collected health data.**

|                           | Item No. | STROBE items                                                                                                                                                                                                                                           | Section/Location in manuscript where items are reported | RECORD items                                                                                                                                                                                                                                                                                                                                                                                                                                | Section/Location in manuscript where items are reported |
|---------------------------|----------|--------------------------------------------------------------------------------------------------------------------------------------------------------------------------------------------------------------------------------------------------------|---------------------------------------------------------|---------------------------------------------------------------------------------------------------------------------------------------------------------------------------------------------------------------------------------------------------------------------------------------------------------------------------------------------------------------------------------------------------------------------------------------------|---------------------------------------------------------|
| <b>Title and abstract</b> |          |                                                                                                                                                                                                                                                        |                                                         |                                                                                                                                                                                                                                                                                                                                                                                                                                             |                                                         |
|                           | 1        | (a) Indicate the study's design with a commonly used term in the title or the abstract<br><br>(b) Provide in the abstract an informative and balanced summary of what was done and what was found                                                      | Title<br><br>Title                                      | RECORD 1.1: The type of data used should be specified in the title or abstract. When possible, the name of the databases used should be included.<br><br>RECORD 1.2: If applicable, the geographic region and timeframe within which the study took place should be reported in the title or abstract.<br><br>RECORD 1.3: If linkage between databases was conducted for the study, this should be clearly stated in the title or abstract. | Title<br><br>Title<br><br>NA                            |
| <b>Introduction</b>       |          |                                                                                                                                                                                                                                                        |                                                         |                                                                                                                                                                                                                                                                                                                                                                                                                                             |                                                         |
| Background rationale      | 2        | Explain the scientific background and rationale for the investigation being reported                                                                                                                                                                   | Introduction                                            |                                                                                                                                                                                                                                                                                                                                                                                                                                             |                                                         |
| Objectives                | 3        | State specific objectives, including any prespecified hypotheses                                                                                                                                                                                       | Introduction                                            |                                                                                                                                                                                                                                                                                                                                                                                                                                             |                                                         |
| <b>Methods</b>            |          |                                                                                                                                                                                                                                                        |                                                         |                                                                                                                                                                                                                                                                                                                                                                                                                                             |                                                         |
| Study Design              | 4        | Present key elements of study design early in the paper                                                                                                                                                                                                | Study design and data sources                           |                                                                                                                                                                                                                                                                                                                                                                                                                                             |                                                         |
| Setting                   | 5        | Describe the setting, locations, and relevant dates, including periods of recruitment, exposure, follow-up, and data collection                                                                                                                        | Materials and methods                                   |                                                                                                                                                                                                                                                                                                                                                                                                                                             |                                                         |
| Participants              | 6        | (a) <i>Cohort study</i> - Give the eligibility criteria, and the sources and methods of selection of participants. Describe methods of follow-up<br>(b) <i>Case-control study</i> - Give the eligibility criteria, and the sources and methods of case | Population                                              | RECORD 6.1: The methods of study population selection (such as codes or algorithms used to identify subjects) should be listed in detail. If this is not possible, an explanation should be provided.                                                                                                                                                                                                                                       | NA                                                      |

|                           | Item No. | STROBE items                                                                                                                                                                                                                                                                                                                                                                                                                                           | Section/Location in manuscript where items are reported     | RECORD items                                                                                                                                                                                                                                                                                                                                                                                                                                                                     | Section/Location in manuscript where items are reported |
|---------------------------|----------|--------------------------------------------------------------------------------------------------------------------------------------------------------------------------------------------------------------------------------------------------------------------------------------------------------------------------------------------------------------------------------------------------------------------------------------------------------|-------------------------------------------------------------|----------------------------------------------------------------------------------------------------------------------------------------------------------------------------------------------------------------------------------------------------------------------------------------------------------------------------------------------------------------------------------------------------------------------------------------------------------------------------------|---------------------------------------------------------|
|                           |          | ascertainment and control selection. Give the rationale for the choice of cases and controls<br><i>Cross-sectional study</i> - Give the eligibility criteria, and the sources and methods of selection of participants<br><br><i>(b) Cohort study</i> - For matched studies, give matching criteria and number of exposed and unexposed<br><i>Case-control study</i> - For matched studies, give matching criteria and the number of controls per case |                                                             | RECORD 6.2: Any validation studies of the codes or algorithms used to select the population should be referenced. If validation was conducted for this study and not published elsewhere, detailed methods and results should be provided.<br><br>RECORD 6.3: If the study involved linkage of databases, consider use of a flow diagram or other graphical display to demonstrate the data linkage process, including the number of individuals with linked data at each stage. | NA<br><br>NA                                            |
| Variables                 | 7        | Clearly define all outcomes, exposures, predictors, potential confounders, and effect modifiers. Give diagnostic criteria, if applicable.                                                                                                                                                                                                                                                                                                              | Primary and secondary outcomes                              | RECORD 7.1: A complete list of codes and algorithms used to classify exposures, outcomes, confounders, and effect modifiers should be provided. If these cannot be reported, an explanation should be provided.                                                                                                                                                                                                                                                                  | Supplementary material                                  |
| Data sources/ measurement | 8        | For each variable of interest, give sources of data and details of methods of assessment (measurement). Describe comparability of assessment methods if there is more than one group                                                                                                                                                                                                                                                                   | Primary and secondary outcomes and supplementary material 1 |                                                                                                                                                                                                                                                                                                                                                                                                                                                                                  |                                                         |
| Bias                      | 9        | Describe any efforts to address potential sources of bias                                                                                                                                                                                                                                                                                                                                                                                              | Discussion – strengths and weaknesses                       |                                                                                                                                                                                                                                                                                                                                                                                                                                                                                  |                                                         |
| Study size                | 10       | Explain how the study size was arrived at                                                                                                                                                                                                                                                                                                                                                                                                              | Protocol paper                                              |                                                                                                                                                                                                                                                                                                                                                                                                                                                                                  |                                                         |
| Quantitative variables    | 11       | Explain how quantitative variables were handled in the analyses. If applicable, describe which groupings were chosen, and why                                                                                                                                                                                                                                                                                                                          | Analysis                                                    |                                                                                                                                                                                                                                                                                                                                                                                                                                                                                  |                                                         |
| Statistical methods       | 12       | (a) Describe all statistical methods, including those used to control for confounding                                                                                                                                                                                                                                                                                                                                                                  | Analysis                                                    |                                                                                                                                                                                                                                                                                                                                                                                                                                                                                  |                                                         |

|                                  | Item No. | STROBE items                                                                                                                                                                                                                                                                                                                                                                                                                                                                | Section/Location in manuscript where items are reported | RECORD items                                                                                                                                                                                                                                                                                                       | Section/Location in manuscript where items are reported |
|----------------------------------|----------|-----------------------------------------------------------------------------------------------------------------------------------------------------------------------------------------------------------------------------------------------------------------------------------------------------------------------------------------------------------------------------------------------------------------------------------------------------------------------------|---------------------------------------------------------|--------------------------------------------------------------------------------------------------------------------------------------------------------------------------------------------------------------------------------------------------------------------------------------------------------------------|---------------------------------------------------------|
|                                  |          | (b) Describe any methods used to examine subgroups and interactions<br>(c) Explain how missing data were addressed<br>(d) <i>Cohort study</i> - If applicable, explain how loss to follow-up was addressed<br><i>Case-control study</i> - If applicable, explain how matching of cases and controls was addressed<br><i>Cross-sectional study</i> - If applicable, describe analytical methods taking account of sampling strategy<br>(e) Describe any sensitivity analyses |                                                         |                                                                                                                                                                                                                                                                                                                    |                                                         |
| Data access and cleaning methods |          | ..                                                                                                                                                                                                                                                                                                                                                                                                                                                                          |                                                         | RECORD 12.1: Authors should describe the extent to which the investigators had access to the database population used to create the study population.<br><br>RECORD 12.2: Authors should provide information on the data cleaning methods used in the study.                                                       | Analysis<br><br>Analysis                                |
| Linkage                          |          | ..                                                                                                                                                                                                                                                                                                                                                                                                                                                                          |                                                         | RECORD 12.3: State whether the study included person-level, institutional-level, or other data linkage across two or more databases. The methods of linkage and methods of linkage quality evaluation should be provided.                                                                                          | Study design and data sources                           |
| <b>Results</b>                   |          |                                                                                                                                                                                                                                                                                                                                                                                                                                                                             |                                                         |                                                                                                                                                                                                                                                                                                                    |                                                         |
| Participants                     | 13       | (a) Report the numbers of individuals at each stage of the study ( <i>e.g.</i> , numbers potentially eligible, examined for eligibility, confirmed eligible, included in the study, completing follow-up, and analysed)<br>(b) Give reasons for non-participation at each stage.<br>(c) Consider use of a flow diagram                                                                                                                                                      | Results: Study population                               | RECORD 13.1: Describe in detail the selection of the persons included in the study ( <i>i.e.</i> , study population selection) including filtering based on data quality, data availability and linkage. The selection of included persons can be described in the text and/or by means of the study flow diagram. | Results: Study population                               |

|                   | Item No. | STROBE items                                                                                                                                                                                                                                                                                                                                                                                                             | Section/Location in manuscript where items are reported | RECORD items | Section/Location in manuscript where items are reported |
|-------------------|----------|--------------------------------------------------------------------------------------------------------------------------------------------------------------------------------------------------------------------------------------------------------------------------------------------------------------------------------------------------------------------------------------------------------------------------|---------------------------------------------------------|--------------|---------------------------------------------------------|
| Descriptive data  | 14       | (a) Give characteristics of study participants ( <i>e.g.</i> , demographic, clinical, social) and information on exposures and potential confounders<br>(b) Indicate the number of participants with missing data for each variable of interest<br>(c) <i>Cohort study</i> - summarise follow-up time ( <i>e.g.</i> , average and total amount)                                                                          | Results: Study population, table 1                      |              |                                                         |
| Outcome data      | 15       | <i>Cohort study</i> - Report numbers of outcome events or summary measures over time<br><i>Case-control study</i> - Report numbers in each exposure category, or summary measures of exposure<br><i>Cross-sectional study</i> - Report numbers of outcome events or summary measures                                                                                                                                     | Results, table 2                                        |              |                                                         |
| Main results      | 16       | (a) Give unadjusted estimates and, if applicable, confounder-adjusted estimates and their precision ( <i>e.g.</i> , 95% confidence interval). Make clear which confounders were adjusted for and why they were included<br>(b) Report category boundaries when continuous variables were categorized<br>(c) If relevant, consider translating estimates of relative risk into absolute risk for a meaningful time period | Results, table 1 and 2, supplementary material 4-5      |              |                                                         |
| Other analyses    | 17       | Report other analyses done— <i>e.g.</i> , analyses of subgroups and interactions, and sensitivity analyses                                                                                                                                                                                                                                                                                                               | Results, supplementary material 4-5                     |              |                                                         |
| <b>Discussion</b> |          |                                                                                                                                                                                                                                                                                                                                                                                                                          |                                                         |              |                                                         |
| Key results       | 18       | Summarise key results with reference to study objectives                                                                                                                                                                                                                                                                                                                                                                 | Discussion-Principal findings                           |              |                                                         |

|                                                           | Item No. | STROBE items                                                                                                                                                               | Section/Location in manuscript where items are reported | RECORD items                                                                                                                                                                                                                                                                                             | Section/Location in manuscript where items are reported    |
|-----------------------------------------------------------|----------|----------------------------------------------------------------------------------------------------------------------------------------------------------------------------|---------------------------------------------------------|----------------------------------------------------------------------------------------------------------------------------------------------------------------------------------------------------------------------------------------------------------------------------------------------------------|------------------------------------------------------------|
| Limitations                                               | 19       | Discuss limitations of the study, taking into account sources of potential bias or imprecision. Discuss both direction and magnitude of any potential bias                 | Discussion-Strengths and weaknesses                     | RECORD 19.1: Discuss the implications of using data that were not created or collected to answer the specific research question(s). Include discussion of misclassification bias, unmeasured confounding, missing data, and changing eligibility over time, as they pertain to the study being reported. | Page 16                                                    |
| Interpretation                                            | 20       | Give a cautious overall interpretation of results considering objectives, limitations, multiplicity of analyses, results from similar studies, and other relevant evidence | Discussion-strengths and weaknesses                     |                                                                                                                                                                                                                                                                                                          |                                                            |
| Generalisability                                          | 21       | Discuss the generalisability (external validity) of the study results                                                                                                      | Discussion - findings in context                        |                                                                                                                                                                                                                                                                                                          |                                                            |
| <b>Other Information</b>                                  |          |                                                                                                                                                                            |                                                         |                                                                                                                                                                                                                                                                                                          |                                                            |
| Funding                                                   | 22       | Give the source of funding and the role of the funders for the present study and, if applicable, for the original study on which the present article is based              | Funding                                                 |                                                                                                                                                                                                                                                                                                          |                                                            |
| Accessibility of protocol, raw data, and programming code |          | ..                                                                                                                                                                         |                                                         | RECORD 22.1: Authors should provide information on how to access any supplemental information such as the study protocol, raw data, or programming code.                                                                                                                                                 | Data sharing statement, protocol, Supplementary material 2 |

**Supplementary material 4: Hospital admissions for respiratory infections not necessarily recorded as COVID-19 for domiciliary care workers from March 2016 to October 2021.**

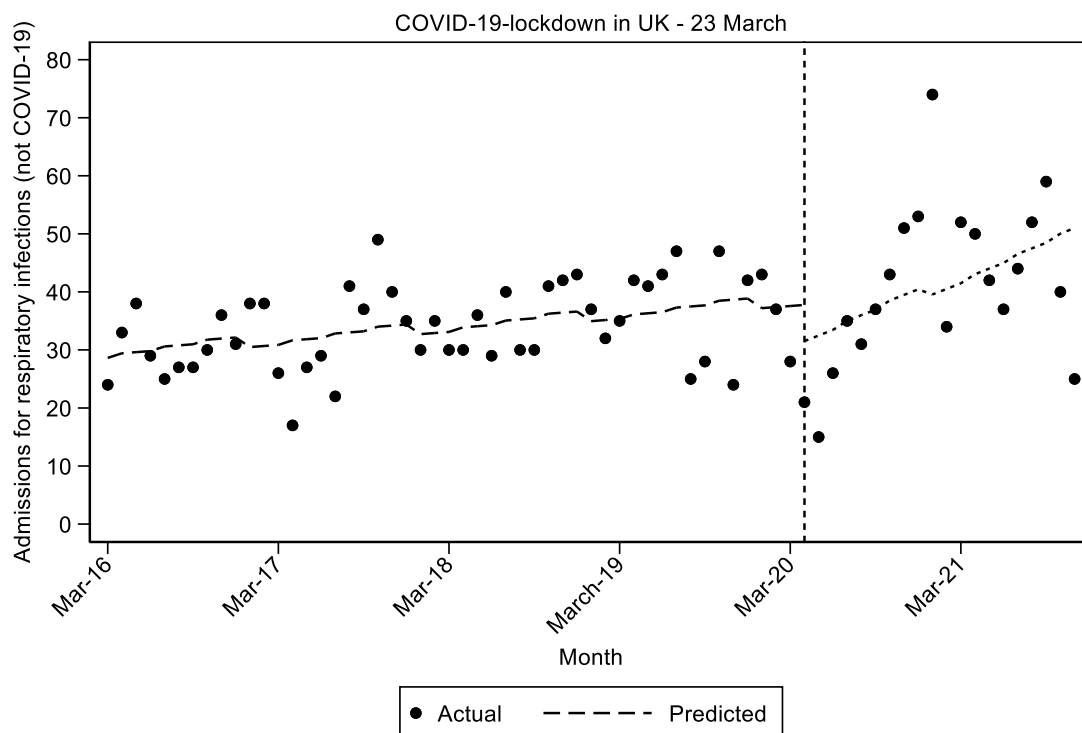

**Supplementary material 5: Characteristics of domiciliary care workers receiving at least one fit note in the COVID-19 pandemic between 1st March 2020 and 31st November 2021.**

| Characteristics                | N     | %    |
|--------------------------------|-------|------|
| <b>Source: SCW<sup>a</sup></b> |       |      |
| Sex                            |       |      |
| Female                         | 2,004 | 15.1 |
| Male                           | 293   | 11.9 |
| Age (at registration)          |       |      |
| Under 35 years                 | 572   | 12.9 |
| 35 to <45 years                | 380   | 13.5 |
| 45 to <55 years                | 625   | 15.8 |
| 55 years and over              | 720   | 15.9 |
| Ethnicity                      |       |      |
| White                          | 2,220 | 14.8 |
| Black                          | 11    | 7.8  |
| Mixed                          | *     | *    |
| Asian                          | 14    | 13.0 |

| Characteristics                                                                 | N     | %    |
|---------------------------------------------------------------------------------|-------|------|
| Other                                                                           | *     | *    |
| Mixed/Other                                                                     | 18    | 9.3  |
| Not recorded                                                                    | 34    | 12.6 |
| <i>* numbers suppressed as &lt;10. Mixed and Other categories are combined.</i> |       |      |
| Lives with DCW                                                                  |       |      |
| No                                                                              | 2,168 | 14.7 |
| Yes                                                                             | 129   | 13.2 |
| Have disability                                                                 |       |      |
| No                                                                              | 2,089 | 14.8 |
| Yes                                                                             | 23    | 12.2 |
| Missing/Prefer not to answer                                                    | 185   | 13.3 |
| Qualifications as recorded at registration                                      |       |      |
| Competence confirmed                                                            | 255   | 12.9 |
| Induction Framework                                                             | 460   | 15.4 |
| Qualification Level 2                                                           | 1,054 | 15.2 |
| Qualification Level 3                                                           | 470   | 14.1 |
| Qualification Level 4+                                                          | 48    | 10.9 |
| Not recorded                                                                    | 10    | 23.3 |
| Employment sector as recorded at registration                                   |       |      |
| Private                                                                         | 828   | 12.6 |
| Third Sector                                                                    | 562   | 13.2 |
| Local Authority - Social Services                                               | 678   | 20.5 |
| Recruitment Agency/ Employment Agency                                           | 23    | 13.4 |
| Health/Other                                                                    |       |      |
| Not recorded                                                                    | 206   | 14.8 |
| Smoking status                                                                  |       |      |
| Non-smoker                                                                      | 917   | 14.5 |
| Ex-smoker                                                                       | 601   | 12.0 |
| Current smoker                                                                  | 779   | 17.8 |
| Body Mass Index                                                                 |       |      |
| Underweight (<18.5)                                                             | 37    | 14.5 |
| Healthy weight (18.5-24.9)                                                      | 466   | 14.7 |
| Overweight (25-29.9)                                                            | 576   | 15.8 |
| Obese (≥30)                                                                     | 993   | 18.7 |
| Not recorded                                                                    | 225   | 6.8  |
| Any comorbidity <sup>d</sup>                                                    |       |      |
| No                                                                              | 1,027 | 11.5 |
| Yes                                                                             | 1,270 | 18.7 |
| On COVID-19 shielding list                                                      |       |      |
| No                                                                              | 2,175 | 14.4 |
| Yes                                                                             | 122   | 19.2 |
| Resident health board                                                           |       |      |
| Aneurin Bevan                                                                   | 319   | 11.3 |
| Betsi Cadwaladr                                                                 | 854   | 23.2 |
| Cardiff and Vale                                                                | 219   | 12.2 |
| Cwm Taf Morgannwg                                                               | 365   | 13.5 |

| Characteristics         | N     | %    |
|-------------------------|-------|------|
| Hywel Dda               | 225   | 11.5 |
| Powys                   | 83    | 12.5 |
| Swansea Bay             | 232   | 11.1 |
| WIMD 2019 quintile      |       |      |
| 1 (most deprived)       | 636   | 15.3 |
| 2                       | 547   | 13.8 |
| 3                       | 478   | 14.5 |
| 4                       | 390   | 15.3 |
| 5 (most affluent)       | 246   | 14.2 |
| Rurality classification |       |      |
| Rural                   | 718   | 14.6 |
| Urban                   | 1,579 | 14.6 |

a between 1<sup>st</sup> March 2020 to 31<sup>st</sup> November 2021; b data source = Social Care Wales (DSCW) data and include data that is self-reported by DCWs at 1st April. If missing, then other sources (ONS 2011 Census Wales (CENW), Wales Longitudinal General Practice (WLGP), Patient Episode Dataset for Wales (PEDW), Emergency Department Dataset (EDDS)) were used to impute (at index date=1st March 2020); c data source = WLGP; d data source=PEDW; e most recent occurring between 1st January 2000 and 1st March 2020; f based on residential address at 1st March 2020; g data source =Welsh Demographic Service Dataset (WDSD).







**Supplementary material 6: Demographics of DCWs across the UK**

| Nation                          | Date published | Definition                    | Denom.  | Age                | Gender                                                                     | Ethnicity                   |
|---------------------------------|----------------|-------------------------------|---------|--------------------|----------------------------------------------------------------------------|-----------------------------|
| Wales <sup>[1]</sup>            | April 2021     | DCWs                          | 22,131  | 44 years (mean)    | 84% F<br>16% M                                                             | 97% White British           |
| OSCAR sample                    | April 2020     | DCWs                          | 15,725  | 44 years (mean)    | 84% F<br>16% M                                                             | 96% White British           |
| England <sup>[2]</sup>          | October 2021   | DCWs                          | 590,000 | 44 years (mean)    | 84% F<br>16% M                                                             | na                          |
| Scotland <sup>[3]</sup>         | December 2020  | Housing support/ care at home | 74,870  | 46 years (median)  | 77% F<br>17 %M<br>6% unknown<br><br>84% F<br>16% M<br>(excluding unknowns) | 98% White<br>2% Asian/Black |
| Northern Ireland <sup>[4]</sup> | October 2020   | DCWs                          | 16,303  | 20-29 years (mode) | 91% F<br>8% M<br>1% Other                                                  | na                          |

na = not available

<sup>[1]</sup> [Domiciliary-care-worker-ENG.pdf \(socialcare.wales\) https://socialcare.wales/cms\\_assets/file-uploads/Domiciliary-care-worker-ENG.pdf](https://socialcare.wales/cms_assets/file-uploads/Domiciliary-care-worker-ENG.pdf)

<sup>[2]</sup> [The state of the adult social care sector and workforce in England \(skillsforcare.org.uk\) https://www.skillsforcare.org.uk/adult-social-care-workforce-data/Workforce-intelligence/publications/national-information/The-state-of-the-adult-social-care-sector-and-workforce-in-England.aspx](https://www.skillsforcare.org.uk/adult-social-care-workforce-data/Workforce-intelligence/publications/national-information/The-state-of-the-adult-social-care-sector-and-workforce-in-England.aspx)

<sup>[3]</sup> [Adults' services workforce tables - 2019 | Scottish Social Services Workforce Data \(sssc.uk.com\) https://data.sssc.uk.com/data-publications/248-adults-services-workforce-in-scotland-tables-2019](https://data.sssc.uk.com/data-publications/248-adults-services-workforce-in-scotland-tables-2019)

<sup>[4]</sup> [Rapid learning review of domiciliary care in Northern Ireland \(Department of Health\) https://www.health-ni.gov.uk/rli-dom-care](https://www.health-ni.gov.uk/rli-dom-care) (page 13)

**The original protocol for the study, as a supplementary file**
